# Supplementary material
Source: Springer Nature journal article supplement (https://www.springermedizin.de/resource/supplementary/12958_2013_1104_MOESM1_ESM.pdf/9566830)
Supplement: MOESM1 [file 9566830]

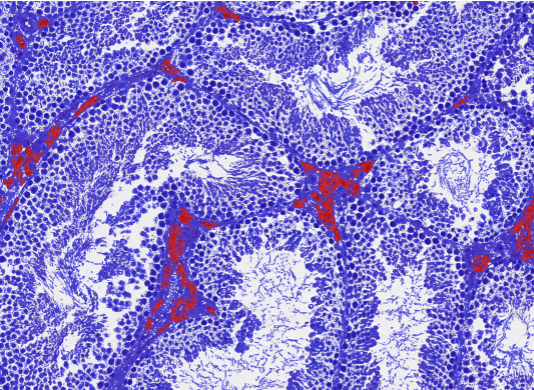

50% transparent

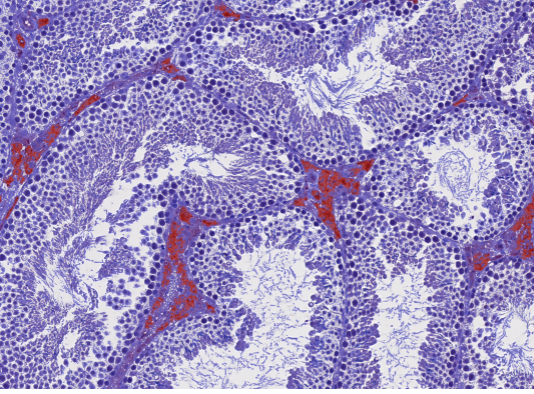

75% transparent

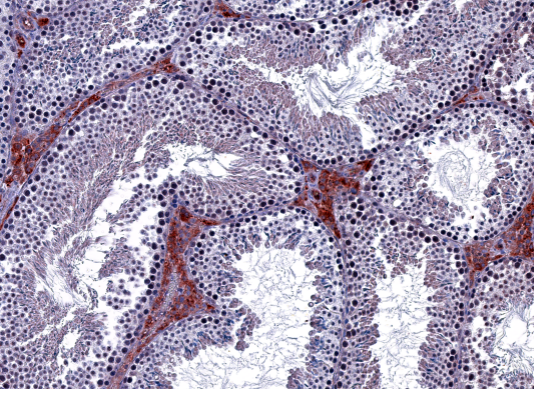

100% transparent
